# Supplementary material for: Bayesian earthquake dating and seismic hazard assessment using chlorine-36 measurements (BED v1)
Source: Copernicus journal article supplement (doi:10.5194/gmd-11-4383-2018), 2018-11-01
Supplement: Supplementary file 2 [file gmd-11-4383-2018-supplement.zip]

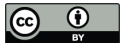

## *Supplement of*

# **Bayesian earthquake dating and seismic hazard assessment using chlorine-36 measurements (BED v1)**

**Joakim Beck et al.**

*Correspondence to:* Joakim Beck ([joakim.beck@kaust.edu.sa](mailto:joakim.beck@kaust.edu.sa))

- [gmd-11-4383-2018-supplement-title-page.pdf](#)
- [bed36CI-1.0.1](#)
  - CaseStudies
    - \* FIAM
    - \* FRAT
    - \* Synthetic
    - \* Synthetic\_small
  - LoadBED.m
  - MCMC
    - \* BED.m
    - \* Sampler.m
    - \* add\_defaults.m
  - Misc
    - \* CV.m
    - \* NormalProposal.m
    - \* PSRF.m
    - \* UniformProposal.m
    - \* add\_BED\_path.m
    - \* burn\_in.m
    - \* discrete\_draw.m
    - \* distFig.m
    - \* invgampdf.m
    - \* invgamrnd.m
    - \* join\_runs.m
    - \* license\_distfig.txt
    - \* license\_num2ordinal.txt

- \* license\_wprctile.txt
- \* load\_case\_study.m
- \* load\_results.m
- \* max\_such\_that.m
- \* min\_such\_that.m
- \* num2ordinal.m
- \* randfixedsum.m
- \* sg
- \* strip\_pre\_erosion.m
- \* tensor\_evaluation.m
- \* thin.m
- \* wRMS.m
- \* w\_quantile.m
- \* wprctile.m
- README.md
- RunBED.m
- SimulateCl36
  - \* attenuationlengths.m
  - \* constants.m
  - \* offline\_phase.m
  - \* ppm\_function.m
  - \* productionCl36.m
  - \* scaling.m
  - \* simulateCl36.m
- Visualization
  - \* BED\_plots.m
  - \* LS\_plot.m
  - \* correlation\_plot.m
  - \* events\_scatter\_plot.m
  - \* fixed\_time\_slip\_plot.m
  - \* gelman\_rubin\_plot.m
  - \* histogram\_plot.m
  - \* intensity\_plot.m
  - \* next\_earthquake\_plot.m
  - \* recent\_earthquakes\_plot.m
  - \* simulations\_plot.m
  - \* slip\_history\_plot.m
- VisualizeBED.m
- manual.pdf

The copyright of individual parts of the supplement might differ from the CC BY 4.0 License.
